# Supplementary material
Source: HighWire-hosted journal article supplement (doi:10.1101/rna.032185.111)
Supplement: SuppLegend_REV.docx [file SuppLegend_REV.docx]

**SUPPLEMENTAL FIGURE LEGEND**

**FIGURE 1.** **The average ΔG of the base-pairings between miRNAs and their predicted targets that were calculated without the seed match requirement inversely correlates with the organism’s physiological temperature.** We used the ΔG values for the base-pairing of miRNAs and their predicted targets from TargetSpy (Sturm et al., 2010). Shown are the average ΔGs for the miRNA-target base-pairing of four model organisms plotted against the organism’s physiological temperature. The regression line and its correlation coefficient are shown. dme – *Drosophila melanogaster* (fly), hsa – *Homo Sapiens* (human), mmu – *Mus musculus* (mouse), gga – *Gallus gallus* (chicken). B) For each of the organisms we divided the miRNA collection into two subsets: 1) miRNAs that are unique to a taxonomic group and 2) the rest of the miRNAs that are shared by other taxonomic groups. Each bar shows the difference between the average ΔG values of the two subsets for the predicted miRNAs-targets binding sites ± standard error of the difference between two means. The label under each bar describes the organism and miRNAs classifiers (i.e. the taxonomic group according to which we sorted the organism miRNAs into two subsets). *p*<0.0005 (**) as indicated.
