# Supplementary material
Source: HighWire-hosted journal article supplement (doi:10.1101/rna.032185.111)
Supplement: SuppTable1.docx [file SuppTable1.docx]

**SUPPLEMENTAL TABLE 1. Average G/C content of miRNAs seeds, pre-miRNAs loops and miRNAs flanking region calculated for nine organisms (see text)**
